# Supplementary material
Source: ML conference proceedings conference paper supplement (https://openaccess.thecvf.com/content/CVPR2026/html/Liu_SECOS_Semantic_Capture_CVPR_2026_paper.html)
Supplement: Supplementary file 1 [file Liu_SECOS_Semantic_Capture_CVPR_2026_supplemental.pdf]

# SECOS: Semantic Capture for Rigorous Classification in Open-World Semi-Supervised Learning

## Supplementary Material

### Compatibility with Multiple PEFT Methods

SECOS does not rely exclusively on the adapter-based parameter-efficient fine-tuning (PEFT) strategy. We replace the Adapter for Semantic Feature Alignment stage with alternatives such as CoOp and LoRA, updating only these modules with the same objective while keeping the backbone model frozen. The experimental results are presented in Tab. 6 and Tab. 7. As shown, CoOp, LoRA, and Adapter yield comparable performance, demonstrating the robustness of SECOS to different PEFT strategies and validating the effectiveness of its semantic capture and supervision enhancement design.

### Evaluating without Hungarian Matching

To demonstrate that existing OWSSL and GCD methods cannot directly predict textual labels, we exclude Hungarian Matching from the evaluation. Instead, classification accuracy is computed by directly comparing the predicted labels with the ground truth. The results are shown in Tab. 8 and Tab. 9. Existing methods suffer severe drops in Novel accuracy, indicating their inability to directly predict textual labels. At the same time, SECOS remains stable, providing evidence for the necessity of SECOS and the tractability of the RC-OWSSL problem.

Table 6. Performance of SECOS using different PEFT strategies on CIFAR10 and ImageNet100.

| Method | PEFT    | CIFAR10 |      |      | ImageNet100 |      |      |
|--------|---------|---------|------|------|-------------|------|------|
|        |         | K       | N    | A    | K           | N    | A    |
| SECOS  | Adapter | 97.9    | 98.8 | 98.1 | 93.4        | 89.8 | 91.7 |
| SECOS  | CoOp    | 94.0    | 95.3 | 94.6 | 91.4        | 89.6 | 90.5 |
| SECOS  | LoRA    | 98.0    | 97.9 | 97.9 | 93.0        | 90.2 | 91.6 |

Table 7. Performance of SECOS using different PEFT strategies on OxfordFlowers and OxfordPets.

| Method | PEFT    | OxfordFlowers |      |      | OxfordPets |      |      |
|--------|---------|---------------|------|------|------------|------|------|
|        |         | K             | N    | A    | K          | N    | A    |
| SECOS  | Adapter | 98.4          | 83.7 | 90.0 | 95.9       | 95.5 | 95.4 |
| SECOS  | CoOp    | 97.4          | 82.7 | 89.1 | 95.2       | 95.2 | 95.2 |
| SECOS  | LoRA    | 97.5          | 83.3 | 89.1 | 96.4       | 95.1 | 95.8 |

Table 8. Evaluation on CIFAR10 without Hungarian Matching. All methods are evaluated by directly comparing predicted labels with ground truth.

| Methods           | Backbone | CIFAR10 |       |       |
|-------------------|----------|---------|-------|-------|
|                   |          | K       | N     | A     |
| ORCA              | ResNet   | 88.29   | 14.57 | 39.02 |
| TRSSL             | ResNet   | 96.58   | 6.48  | 51.53 |
| TIDA              | ResNet   | 97.12   | 13.60 | 55.36 |
| TRAILER           | ResNet   | 93.50   | 19.04 | 56.27 |
| OwMatch           | ResNet   | 94.72   | 17.36 | 56.04 |
| SimGCD            | DINO     | 96.10   | 0.27  | 32.22 |
| TextGCD           | CLIP     | 81.00   | 22.86 | 51.93 |
| ORCA + CoOp       | CLIP     | 96.77   | 87.46 | 90.55 |
| TRSSL + CoOp      | CLIP     | 96.54   | 57.04 | 76.79 |
| TIDA + CoOp       | CLIP     | 20.00   | 0.00  | 10.00 |
| TRAILER + CoOp    | CLIP     | 96.12   | 87.38 | 91.75 |
| OwMatch + CoOp    | CLIP     | 92.56   | 91.34 | 93.78 |
| TIDA + Adapter    | CLIP     | 22.24   | 0.00  | 11.12 |
| TRAILER + Adapter | CLIP     | 98.68   | 17.92 | 58.30 |
| OwMatch + Adapter | CLIP     | 96.10   | 38.96 | 67.53 |
| SECOS (ours)      | CLIP     | 97.85   | 98.76 | 98.14 |

Table 9. Evaluation on CIFAR100 without Hungarian Matching.

| Methods           | Backbone | CIFAR100 |       |       |
|-------------------|----------|----------|-------|-------|
|                   |          | K        | N     | A     |
| ORCA              | ResNet   | 67.17    | 1.81  | 23.48 |
| TRSSL             | ResNet   | 77.12    | 1.94  | 39.53 |
| TIDA              | ResNet   | 78.64    | 1.08  | 39.86 |
| TRAILER           | ResNet   | 71.62    | 1.58  | 36.60 |
| OwMatch           | ResNet   | 77.22    | 1.10  | 39.16 |
| SimGCD            | DINO     | 81.59    | 2.00  | 55.06 |
| TextGCD           | CLIP     | 67.36    | 2.88  | 35.12 |
| ORCA + CoOp       | CLIP     | 65.23    | 45.42 | 51.99 |
| TRSSL + CoOp      | CLIP     | 76.88    | 0.78  | 38.83 |
| TIDA + CoOp       | CLIP     | 2.12     | 1.40  | 1.76  |
| TRAILER + CoOp    | CLIP     | 78.58    | 49.66 | 64.12 |
| OwMatch + CoOp    | CLIP     | 78.88    | 62.74 | 70.81 |
| TIDA + Adapter    | CLIP     | 2.06     | 1.20  | 1.63  |
| TRAILER + Adapter | CLIP     | 87.06    | 33.60 | 59.34 |
| OwMatch + Adapter | CLIP     | 83.82    | 4.64  | 44.23 |
| SECOS (ours)      | CLIP     | 87.06    | 82.62 | 84.68 |
